# Supplementary material for: Dynamic Modulation of Immune-Neural Axis via Controlled Magnesium-Releasing Nanocapsules Accelerates Cranial Bone Regeneration
Source: Research Square preprint supplement (doi:10.21203/rs.3.rs-8441498/v1), 2026-01-08
Supplement: Supplementary file 1 [file 2c61b3d4b80fff17fa810f97.docx]

**Supplementary Information**

**Dynamic Modulation of Immune-Neural Axis via Controlled Magnesium-Releasing Nanocapsules Accelerates Cranial Bone Regeneration**

Yilin Mao1, Qixuan He1, Tianle Li1, Jiusi Guo1, Kelvin W.K.Yeung2, Yuxiong Su3, Jie Shen, Xianglong Han4, Jian Wang4, Wei Qiao1,5*

*Corresponding author

1. Applied Oral Sciences and Community Dental Care, Faculty of Dentistry, The University of Hong Kong, Hong Kong SAR, China

2. Orthopaedics and Traumatology, School of Clinical Medicine, LKS Faculty of Medicine, The University of Hong Kong, Hong Kong SAR, China

3. Oral and Maxillofacial Surgery, Faculty of Dentistry, The University of Hong Kong, Hong Kong SAR, China

4. State Key Laboratory of Oral Diseases, National Clinical Research Center for Oral Diseases, Department of Prosthodontics, West China Hospital of Stomatology, Sichuan University, Sichuan Province, China

5. Shenzhen Key Laboratory for Innovative Technology in Orthopaedic Trauma, The University of Hong Kong-Shenzhen Hospital, Shenzhen, China

**Table 1.**The Primers used for RT-qPCR (GAPDH was used as a housekeeping gene)

| Gene | **Sequences 5’–3’** |
| --- | --- |
| h*IL10* | Forward: 5’-TCAAGGCGCATGTGAACTCC-3’  Reverse: 5’-GATGTCAAACTCACTCATGGCT-3’ |
| h*IL1B* | Forward：5’-ATGATGGCTTATTACAGTGGCAA-3’  Reverse：5’-GTCGGAGATTCGTAGCTGGA-3’ |
| h*TGFB1* | Forward：5’-GGCCAGATCCTGTCCAAGC-3’  Reverse：5’-GTGGGTTTCCACCATTAGCAC-3’ |
| h*IL8* | Forward：5’-TTTTGCCAAGGAGTGCTAAAGA-3’  Reverse：5’-AACCCTCTGCACCCAGTTTTC-3’ |
| h*CCL5* | Forward：5’-CCAGCAGTCGTCTTTGTCAC-3’  Reverse：5’-CTCTGGGTTGGCACACACTT-3’ |
| h*MRC1* | Forward：5’-TCCGGGTGCTGTTCTCCTA-3’  Reverse：5’-CCAGTCTGTTTTTGATGGCACT-3’ |
| h*RUNX2* | Forward：5’-TGGTTACTGTCATGGCGGGTA-3’  Reverse：5’-TCTCAGATCGTTGAACCTTGCTA-3’ |
| h*COL1A1* | Forward：5’-GAGGGCCAAGACGAAGACATC-3’  Reverse：5’-CAGATCACGTCATCGCACAAC-3’ |
| h*ALP* | Forward：5’-AACATCAGGGACATTGACGTG-3’  Reverse：5’-GTATCTCGGTTTGAAGCTCTTCC-3’ |
| h*GAPDH* | Forward：5’-GGAGCGAGATCCCTCCAAAAT-3’  Reverse：5’-GGCTGTTGTCATACTTCTCATGG-3’ |
| h*PTGS2* | Forward：5’-CTGGCGCTCAGCCATACAG-3’  Reverse：5’-CGCACTTATACTGGTCAAATCCC-3’ |
| m*Trpv1* | Forward：5’-CCGGCTTTTTGGGAAGGGT-3’  Reverse：5’-GAGACAGGTAGGTCCATCCAC-3’ |
| m*Ep4* | Forward：5’-CCCTCCTATACCTGCCAGACC-3’  Reverse：5’-CATGCGTACCTGGAAGCAAA-3’ |
| m*Tubb3* | Forward：5’-CCCAGCGGCAACTATGTAGG-3’  Reverse：5’-CCAGACCGAACACTGTCCA-3’ |
| m*Calca* | Forward：5’-GAGGGCTCTAGCTTGGACAG-3’  Reverse：5’-AAGGTGTGAAACTTGTTGAGGT-3’ |
| m*Gapdh* | Forward：5’-ATGTGTCCGTCGTGGATCTGA-3’  Reverse：5’-ATGCCTGCTTCACCACCTTCTT-3’ |


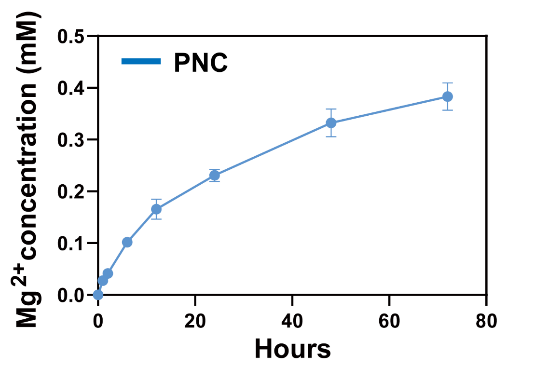


**Figure S1. Mg2+ release profile of PNC tested by ICP-OES.**


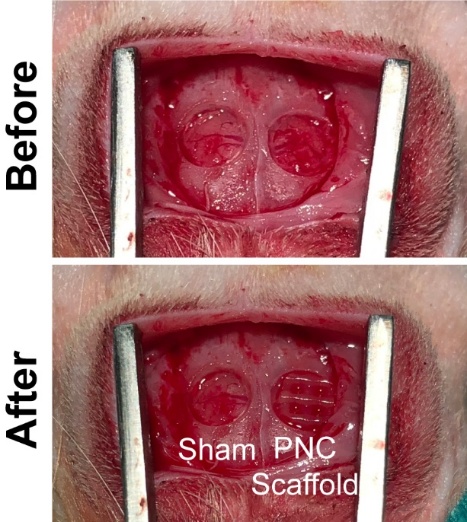


**Figure S2. Representative photograph showing the 3D-printed PNC scaffold placed in the rat critical-sized cranial bone defect.**


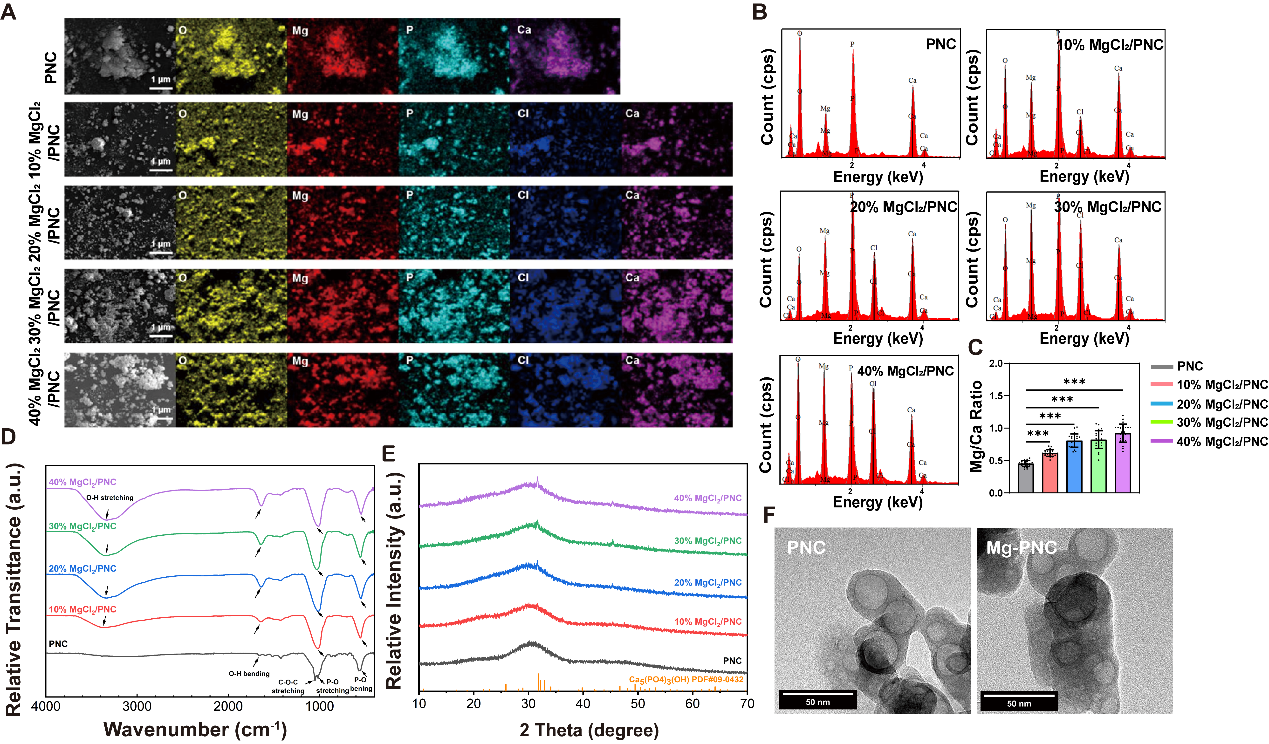


**Figure S3. Nanocapsules loaded with different concentration of MgCl2 for dual-phase Mg2+ release.** A-B) SEM-EDS mapping (A) and EDS spectra (B) of PNC and Mg-PNC loaded with different concentrations of MgCl2.Scale bar = 1 µm. C) Magnesium-to-calcium ratio of Mg-PNC with distinct MgCl2 concentrations. D-E) FT-IR (D) and XRD patterns (E) of PNC and Mg-PNC loaded with different concentrations of MgCl2. F) Representative TEM images of PNC and Mg-PNC. Scale bar= 50nm. * *p* < 0.05, ** *p* < 0.01, *** *p* < 0.001.


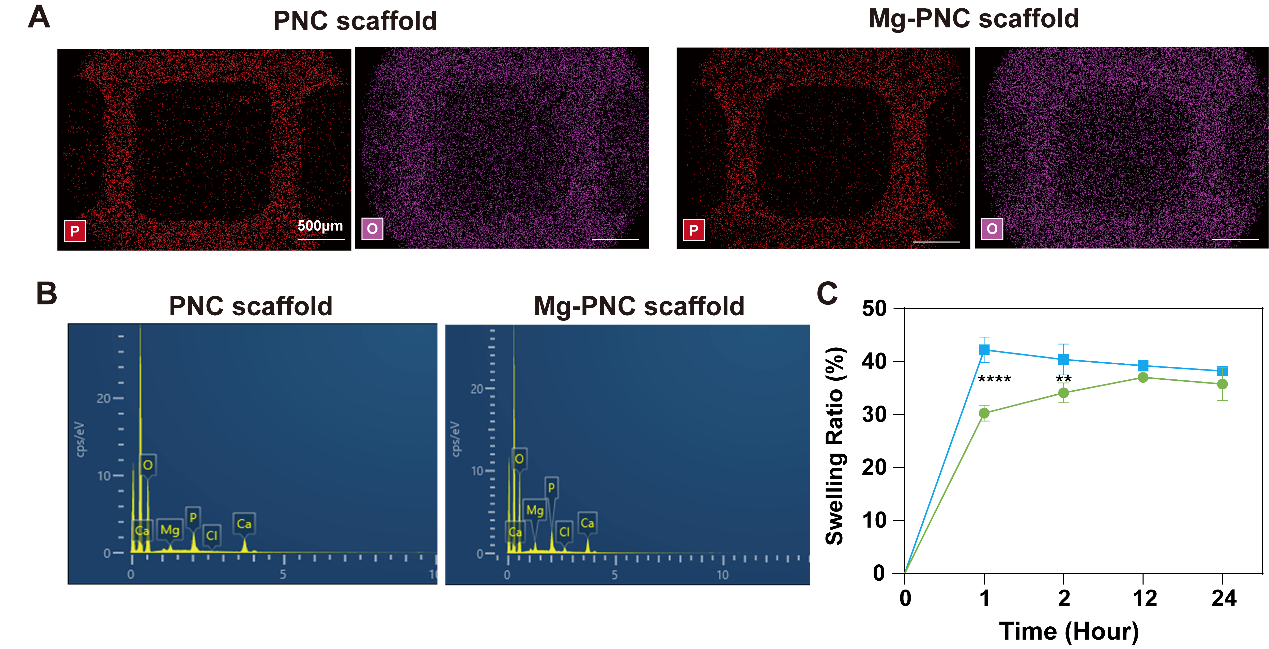


**Figure S4. Surface elemental distribution and swelling behavior of PNC and Mg-PNC.** A) EDS mapping of elemental distribution in PNC and Mg-PNC scaffolds. B) The elemental composition measured by EDS. C) Swelling ratio curve of PNC and Mg-PNC in PBS for 1 day. ***p* < 0.01, *****p* < 0.0001.
